# Supplementary material for: Activated sludge treatment for high ammonium nitrogen wastewater: performance and microbial adaptation with synthetic media
Source: Research Square preprint supplement (doi:10.21203/rs.3.rs-7906893/v1), 2025-11-05
Supplement: Supplementary file 1 [file 7c80535e64f0654c60407c97.docx]

Supplementary material to:

Activated sludge treatment for high ammonium nitrogen wastewater: performance and microbial adaptation with synthetic media

**Kinga Marek1*,** Katarzyna Pawęska1, Aleksandra Bawiec1

1Institute of Environmental Engineering, Wrocław University of Environmental and Life Sciences, 50-375 Wrocław, Poland, 24 Grunwaldzki Square, ([kinga.marek@upwr.edu.pl](mailto:kinga.marek@upwr.edu.pl)***Corresponding author**, [katarzyna.paweska@upwr.edu.pl](mailto:katarzyna.paweska@upwr.edu.pl), [aleksandra.bawiec@upwr.edu.pl](mailto:aleksandra.bawiec@upwr.edu.pl))


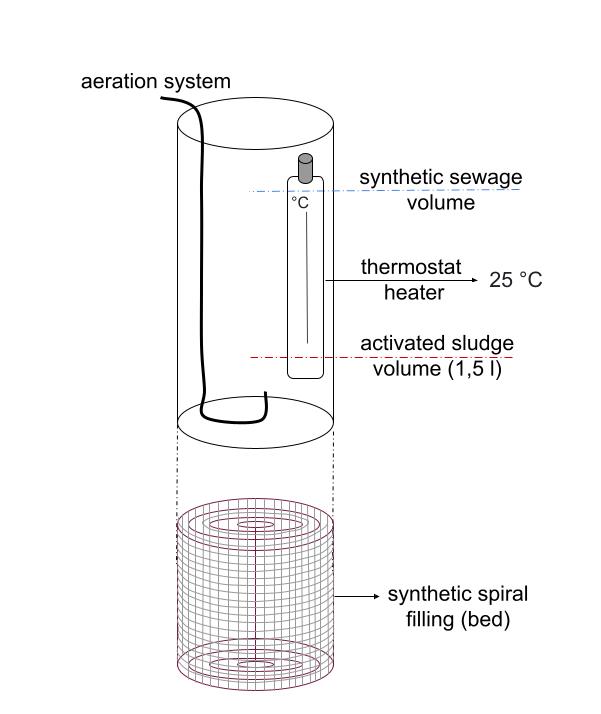


Figure S1. Single cylinder along with its equipment.

Table S1. Synthetic wastewater composition under influent conditions used in the experiment.

| Parameter | Average value |
| --- | --- |
| pH [-] | 7.8 |
| NH4+ [mg/L] | 202.0 (I group)  453.0 (II group) |
| NO3- [mg/L] | 0.4 |
| NO2- [mg/L] | 4.43 |
| PO43- [mg/L] | 6.67 |
| TOC [ppm] | 190.0 |
| C:N [-] | 1.4 (I group)  0.45 (II group) |

Table S2. Analyzed wastewater and sludge parameters with frequency and measurement methods.

| Parameter | Methodology | Measurement frequency |
| --- | --- | --- |
| dissolved oxygen | luminescent quenching | controlled in each phase |
| pH | potentiometric measurement | controlled after each phase of the cycle |
| NH4+ | spectrophotometric analysis | beginning and end of each cycle |
| NO3- |
| NO2- |
| PO43- |
| NH4+ |
| TOC | persulfate oxidation |
| BOD5 | manometric measurement | initial and end of the cycle |
| total solids (TS) | gravimetric analysis | end of the experiment |
| sludge volume index (SVI | settling test |
| sludge/biofilm growth | weight measurement |

Table S3. Statistical significance of differences between cylinders with and without filling.

| Group | Data Sets | Normality Test (Shapiro-Wilk) | Statistic (W) | p-value | Comparison Test | Statistic | p-value |
| --- | --- | --- | --- | --- | --- | --- | --- |
| Group 1 | C-1 | Shapiro-Wilk | 0.85 | 0.02 | Mann-Whitney U | 112.5 | 0.03 |
| G1 | Shapiro-Wilk | 0.75 | <0.01 |
| Group 2 | C-2 | Shapiro-Wilk | 0.96 | 0.33 | t-Student test | 2.10 | 0.04 |
| G2 | Shapiro-Wilk | 0.94 | 0.20 |

Table S4. Details of relative abundance data for bacterial families (family level) in activated sludge samples providing for Figure 3.

| Type | Relative abundance [%] | | | |
| --- | --- | --- | --- | --- |
| C-1 | G1 | C-2 | G2 |
| *Rhodanobacteraceae* | 1.30 | 2.80 | 15.90 | 26.10 |
| *Pirellulaceae* | 4.50 | 5.70 | 1.90 | 4.30 |
| *Rhodobacteraceae* | 2.80 | 3.80 | 3.20 | 5.70 |
| *Comamonadaceae* | 1.70 | 2.50 | 3.00 | 3.50 |
| *Phycisphaeraceae* | 4.00 | 2.50 | 1.30 | 1.80 |
| *Chitinophagaceae* | 1.10 | 0.70 | 2.30 | 3.50 |
| *Gemmataceae* | 4.50 | 1.60 | 0.60 | 1.60 |
| *SC-I-84* | 3.90 | 1.20 | 2.70 | 0.60 |
| *Rhodocyclaceae* | 1.40 | 2.00 | 0.70 | 1.80 |
| *Proteobacteria uncultured* | 2.30 | 1.60 | 0.80 | 1.50 |
| *S-70* | 0.60 | 3.70 | 0.30 | 0.30 |
| *Rhizobiaceae* | 2.40 | 1.00 | 1.50 | 1.30 |
| *Xanthomonadaceae* | 0.30 | 0.60 | 3.50 | 1.70 |
| *Xanthobacteraceae* | 0.90 | 1.20 | 0.60 | 1.90 |
| *Nitrosomonadaceae* | 1.00 | 1.90 | 0.40 | 1.20 |
| *Acetobacteraceae* | 0.70 | 0.80 | 1.30 | 1.70 |
| *SAR324_clade(Marine_group_B);SAR324_clade(Marine_group_B)* | 1.00 | 1.90 | 0.40 | 0.80 |
| *Bryobacteraceae* | 1.20 | 0.90 | 0.70 | 1.50 |
| *OM190* | 1.40 | 1.40 | 1.10 | 0.70 |
| *Microscilaceae* | 1.60 | 1.30 | 0.90 | 0.90 |
| *Caldilineaceae* | 1.50 | 1.50 | 0.40 | 1.40 |
| *Sphingomonadaceae* | 0.40 | 0.30 | 1.50 | 2.10 |
| *Gemmatimonadaceae* | 1.10 | 1.60 | 0.00 | 1.10 |
| *Blastocetallaceae* | 0.20 | 1.20 | 1.10 | 1.20 |
| *CCM11a* | 0.80 | 2.40 | 0.00 | 0.20 |
| other/ remaining taxa (243) | 57.40 | 53.90 | 53.90 | 31.60 |

Table S5. Details of relative abundance data for bacterial genera (genus level) in activated sludge samples providing for Figure 4.

| Type | Relative abundance [%] | | | |
| --- | --- | --- | --- | --- |
| C-1 | G1 | C-2 | G2 |
| *Rhodanobacter* | 0.00 | 0.00 | 17.80 | 25.10 |
| *Proteobacteria uncultured* | 6.10 | 6.20 | 2.70 | 3.50 |
| *Planctomycetota uncultured* | 4.60 | 7.80 | 1.20 | 3.70 |
| *Chloroflexi uncultured* | 2.50 | 2.60 | 0.60 | 0.80 |
| *Bacteroidota uncultured* | 2.60 | 1.40 | 1.30 | 1.20 |
| *Pirellula* | 1.30 | 2.00 | 0.90 | 1.60 |
| *SC-I-84* | 3.90 | 1.20 | 0.00 | 0.60 |
| *S-70* | 0.60 | 3.70 | 0.10 | 0.30 |
| *Rubelimicrobium* | 1.00 | 1.60 | 0.80 | 1.30 |
| *SM1A02* | 2.90 | 1.10 | 0.50 | 0.90 |
| *SAR324_clade(Marine_group_B);SAR324_clade(Marine_group_B)* | 1.00 | 1.90 | 0.40 | 0.80 |
| *Bryobacter* | 1.20 | 1.20 | 0.70 | 1.60 |
| *OM190* | 1.40 | 1.40 | 1.10 | 0.70 |
| *Pir4_lineage* | 1.40 | 1.20 | 0.80 | 0.70 |
| *Gemmatimonadota uncultured* | 1.10 | 1.70 | 0.00 | 0.80 |
| *CCM11a* | 0.80 | 2.40 | 0.00 | 0.20 |
| *Thauera* | 0.50 | 1.80 | 0.00 | 1.30 |
| *Desulfobacterota uncultured* | 0.90 | 1.00 | 0.00 | 1.10 |
| *Paracoccus* | 0.80 | 0.50 | 0.70 | 1.20 |
| *OLB14* | 1.60 | 1.10 | 0.00 | 0.70 |
| *Dokdonella* | 0.20 | 0.80 | 0.80 | 0.90 |
| *Thermomonas* | 0.00 | 0.00 | 0.90 | 1.90 |
| *Nitrosomonas* | 1.00 | 1.70 | 0.00 | 0.35 |
| *Nitrospira* | 0.80 | 0.90 | 0.00 | 0.50 |
| *DS-100* | 0.20 | 1.10 | 0.00 | 1.20 |
| other/ remaining taxa (437) | 61.60 | 53.70 | 68.70 | 48.35 |
